# Supplementary material
Source: Royal Society of Chemistry journal article supplement (doi:10.1039/d6ta01010e)
Supplement: d6ta01010e1.pdf [file d6ta01010e1.pdf]

# Tuning Co-Ni Electrochemical Active Sites via Iron Incorporation in Carbonate Hydroxide Frameworks for High-Performance Supercapacitors

Dwititapa Mohanty<sup>a</sup>, Trupti Tanaya Mishra<sup>a</sup>, Sudhansu B Barik<sup>a</sup>, Ankita Dey<sup>b</sup>, R. Thangavel<sup>b</sup>, , Santosh Kumar Mishra<sup>c</sup>, Dhrubojyoti Roy<sup>#a</sup>, Mohua Chakraborty<sup>\*a</sup>

<sup>a</sup>Department of Physics, C. V. Raman Global University, Bhubaneswar, Odisha-752054, India.

<sup>b</sup>Department of Physics, IIT(ISM), Dhanbad, Jharkhand 826004, India.

<sup>c</sup>School of Chemical Sciences, National Institute of Science Education and Research, Bhubaneswar, Jatni, Khurda, Odisha, 752050, India.

\*Corresponding E-mail: mchakraborty1988@gmail.com.

#Corresponding E-mail: dhrubojyoti27@gmail.com.

We have tested the pH value of solutions in each possible steps of reactions for all nine samples as follows:

| Sample                                      | Nickel Nitrate and Cobalt Nitrate before hydrothermal | Nickel Nitrate, Cobalt Nitrate and Iron Nitrate before hydrothermal | Containing Nickel Nitrate, Cobalt Nitrate, (Iron Nitrate) and Urea before hydrothermal | Containing Nickel Nitrate, Cobalt Nitrate, Iron Nitrate and Urea after hydrothermal |
|---------------------------------------------|-------------------------------------------------------|---------------------------------------------------------------------|----------------------------------------------------------------------------------------|-------------------------------------------------------------------------------------|
| NiCo-CH                                     | ≈ 6.2                                                 | NA                                                                  | ≈ 6.2                                                                                  | ≈ 8.9                                                                               |
| Fe <sub>0.05</sub> Co <sub>0.95</sub> Ni-CH | ≈ 6.1                                                 | ≈ 5.9                                                               | ≈ 5.9                                                                                  | ≈ 7.5                                                                               |
| Fe <sub>0.1</sub> Co <sub>0.90</sub> Ni-CH  | ≈ 6.1                                                 | ≈ 5.2                                                               | ≈ 5.2                                                                                  | ≈ 7.3                                                                               |
| Fe <sub>0.15</sub> Co <sub>0.85</sub> Ni-CH | ≈ 6.0                                                 | ≈ 4.9                                                               | ≈ 4.9                                                                                  | ≈ 7.2                                                                               |
| Fe <sub>0.2</sub> Co <sub>0.80</sub> Ni-CH  | ≈ 6.0                                                 | ≈ 4.8                                                               | ≈ 4.8                                                                                  | ≈ 7                                                                                 |
| Fe <sub>0.05</sub> Ni <sub>0.95</sub> Co-CH | ≈ 6.3                                                 | ≈ 5.9                                                               | ≈ 5.9                                                                                  | ≈ 7.9                                                                               |
| Fe <sub>0.1</sub> Ni <sub>0.90</sub> Co-CH  | ≈ 6.2                                                 | ≈ 5.3                                                               | ≈ 5.3                                                                                  | ≈ 7.8                                                                               |
| Fe <sub>0.15</sub> Ni <sub>0.85</sub> Co-CH | ≈ 6.1                                                 | ≈ 5.1                                                               | ≈ 5.1                                                                                  | ≈ 7.5                                                                               |
| Fe <sub>0.2</sub> Ni <sub>0.80</sub> Co-CH  | ≈ 6.1                                                 | ≈ 4.9                                                               | ≈ 4.9                                                                                  | ≈ 7.1                                                                               |

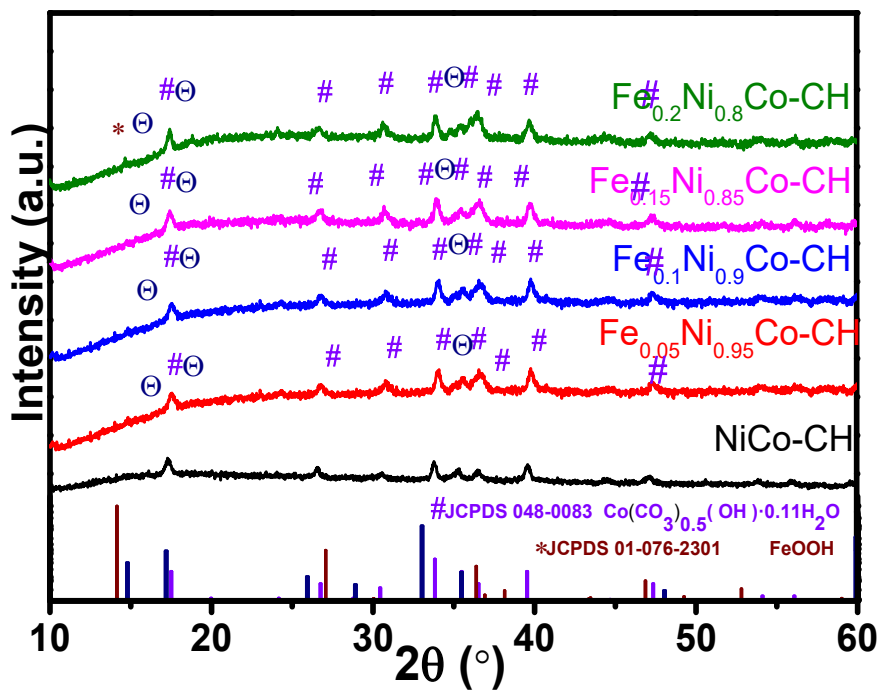

Fig. S1: XRD pattern of  $\text{Fe}_x\text{Ni}_{(1-x)}\text{CoCH}$  samples in zoomed view.

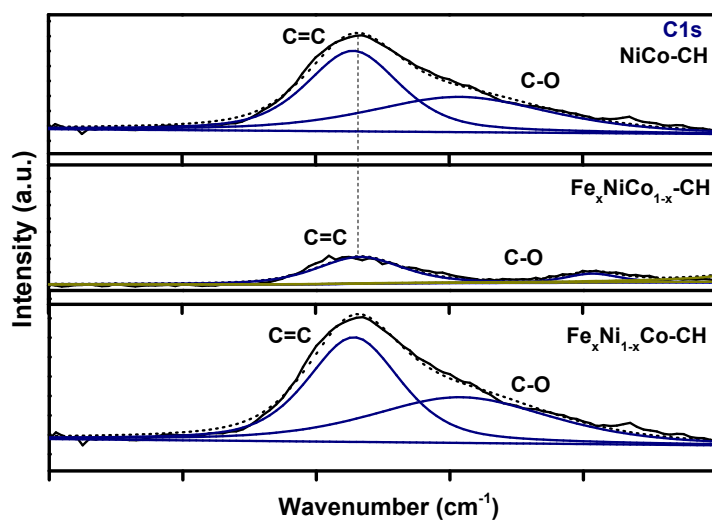

Fig. S2: High-resolution narrow scan XPS spectra for C1s of the as-prepared NiCo-CH,  $\text{Fe}_{0.1}\text{Co}_{0.9}\text{Ni-CH}$  and  $\text{Fe}_{0.05}\text{Co}_{0.95}\text{Ni-CH}$  materials.

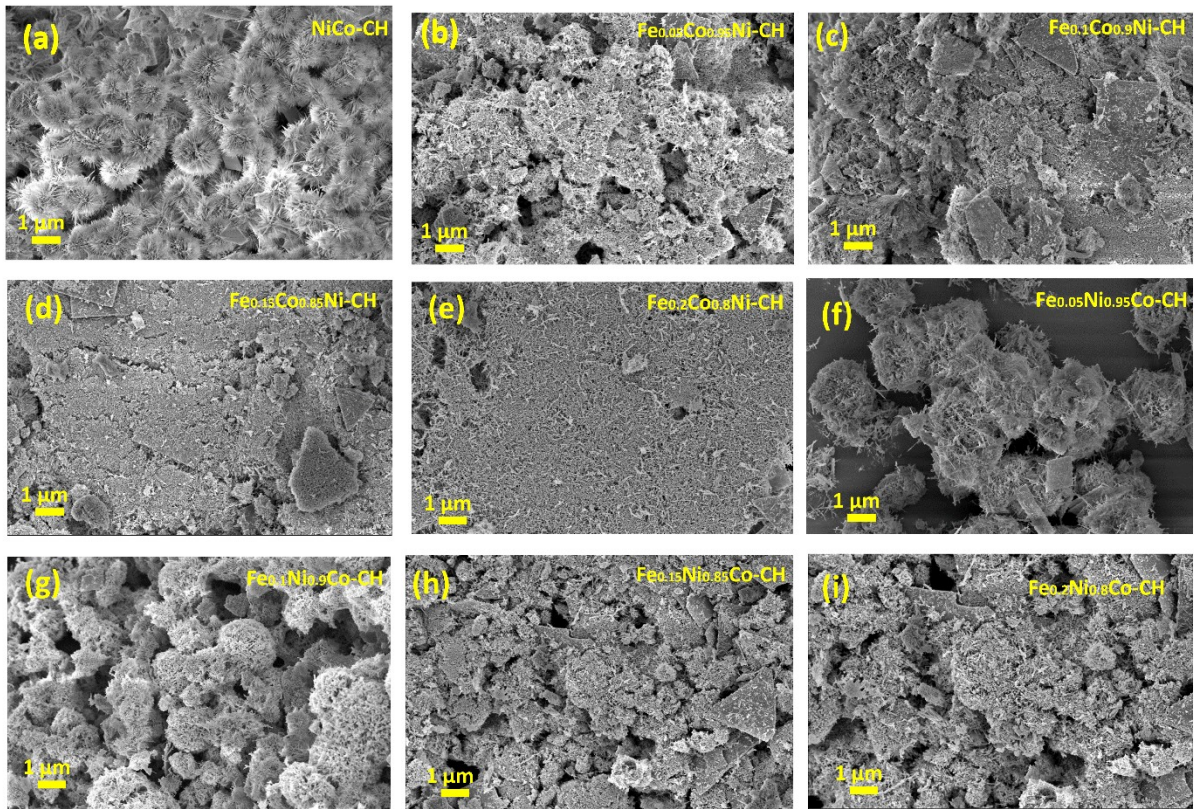

**Fig. S3:** SEM images of (a) NiCo-CH (b-e)  $\text{Fe}_x\text{Co}_{(1-x)}\text{Ni-CH}$  (f-i)  $\text{Fe}_x\text{Ni}_{(1-x)}\text{Co-CH}$  samples

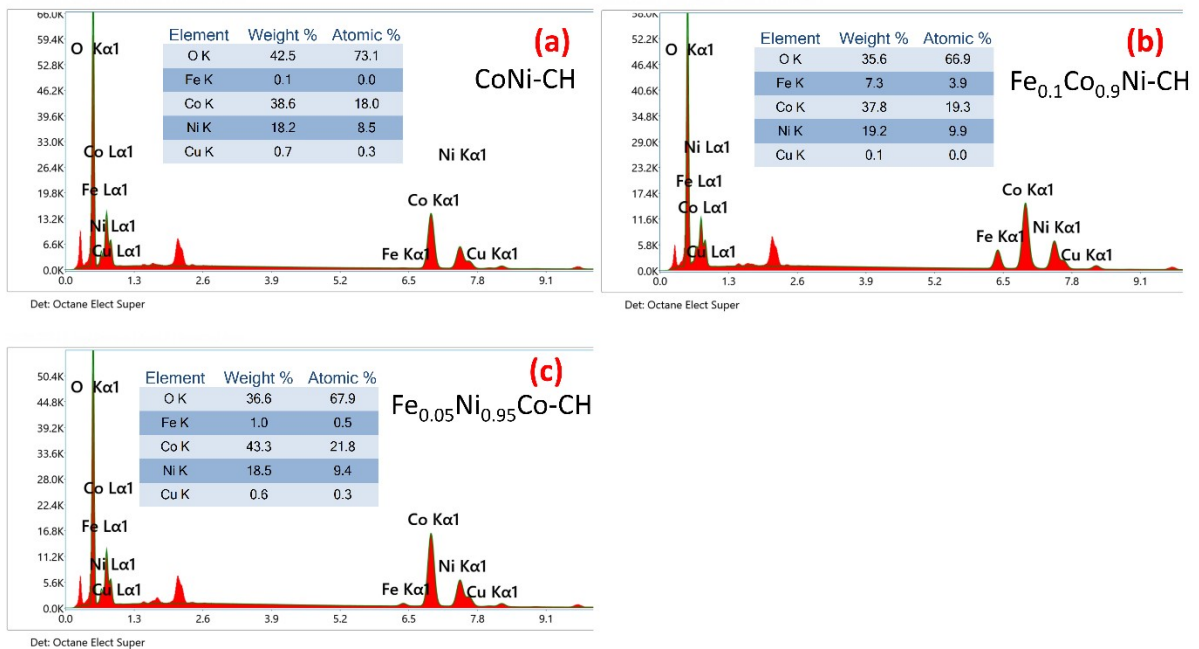

**Fig. S4:** EDAX data of (a) NiCoCH (b)  $\text{Fe}_{0.1}\text{Co}_{0.9}\text{Ni-CH}$  (c)  $\text{Fe}_{0.05}\text{Ni}_{0.95}\text{Co-CH}$  samples

In EDAX pattern, the small Cu signal ( $\sim 0.7$  wt%) observed in Fig. S4 is most likely due to trace contamination from the copper SEM grid or instrumental background during analysis rather than from the synthesis process itself.

**Table S2 : ICP-AES data of optimized samples**

| Sample                                         | Element | Concentration<br>ppm | Weight of element<br>in sample weight | Weight (%) |
|------------------------------------------------|---------|----------------------|---------------------------------------|------------|
| <b>Fe<sub>0.05</sub>Ni<sub>0.95</sub>Co-CH</b> | Ni      | 13.744               | 0.6872                                | 14.0244898 |
|                                                | Co      | 34.364               | 1.7182                                | 35.0653061 |
|                                                | Fe      | 0.912                | 0.0456                                | 0.93061224 |
| <b>Fe<sub>0.1</sub>Co<sub>0.90</sub>Ni-CH</b>  | Ni      | 7.821                | 0.39105                               | 17.0021739 |
|                                                | Co      | 16.272               | 0.8136                                | 35.3739130 |
|                                                | Fe      | 0.985                | 0.04925                               | 2.14130434 |
| <b>NiCo-CH</b>                                 | Ni      | 18.018               | 0.9009                                | 19.1680851 |
|                                                | Co      | 33.905               | 1.69525                               | 36.0691489 |

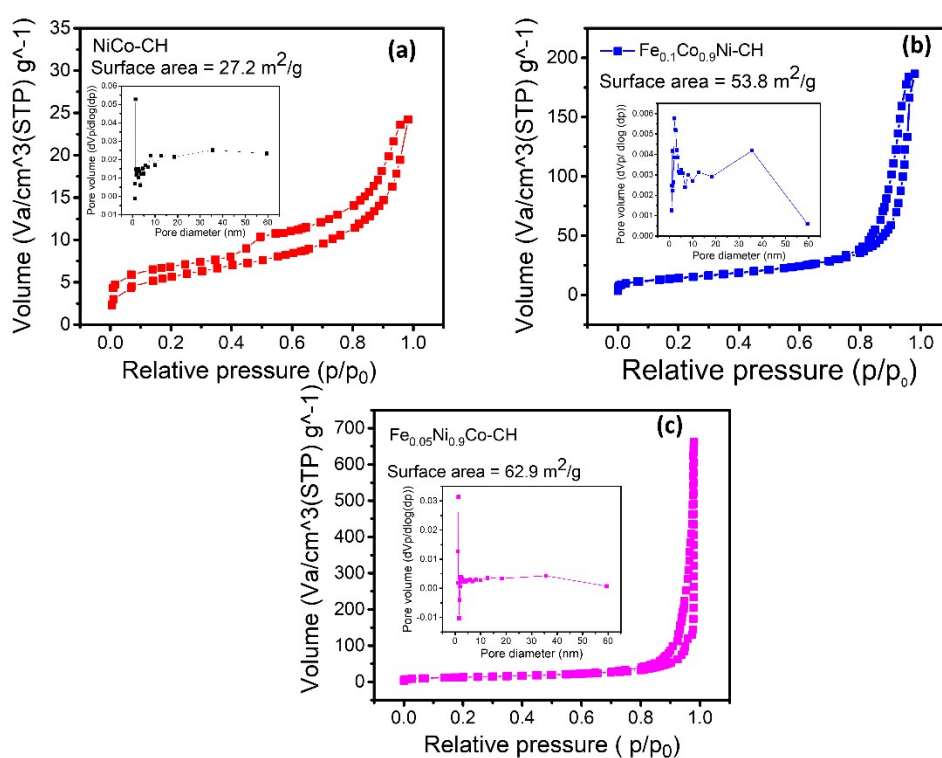

**Fig. S5:** BET measurement for (a) NiCo-CH (b) Fe<sub>0.1</sub>Co<sub>0.9</sub>Ni-CH (c) Fe<sub>0.05</sub>Ni<sub>0.95</sub>Co-CH samples, *in inset* pore volume-pore diameter, respectively.

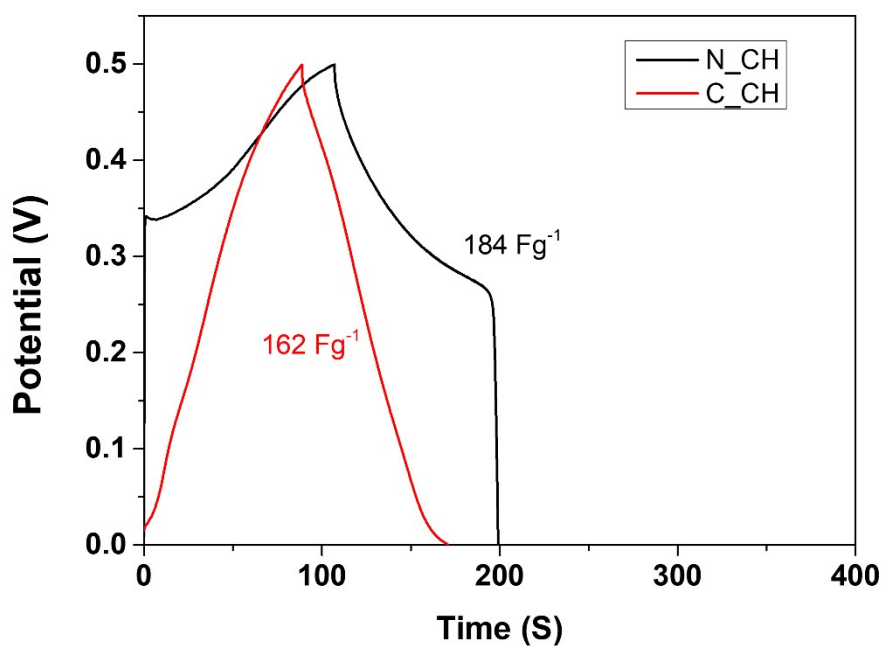

Fig. S6: GCD plot of Ni-CH and Co-CH at 2mVs<sup>-1</sup>.

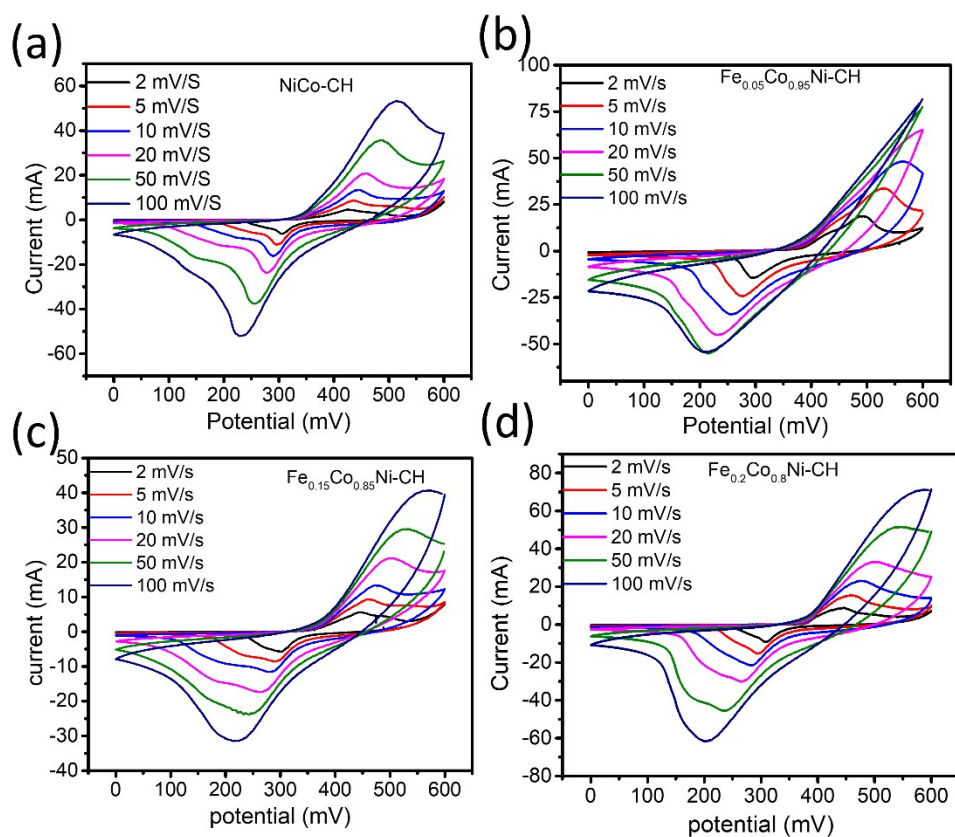

Fig. S7: CV plots of (a) NiCo-CH, (b) Fe<sub>0.05</sub>Co<sub>0.95</sub>Ni-CH (c) Fe<sub>0.15</sub>Co<sub>0.85</sub>Ni-CH (d) Fe<sub>0.2</sub>Co<sub>0.8</sub>Ni-CH at different scan rates

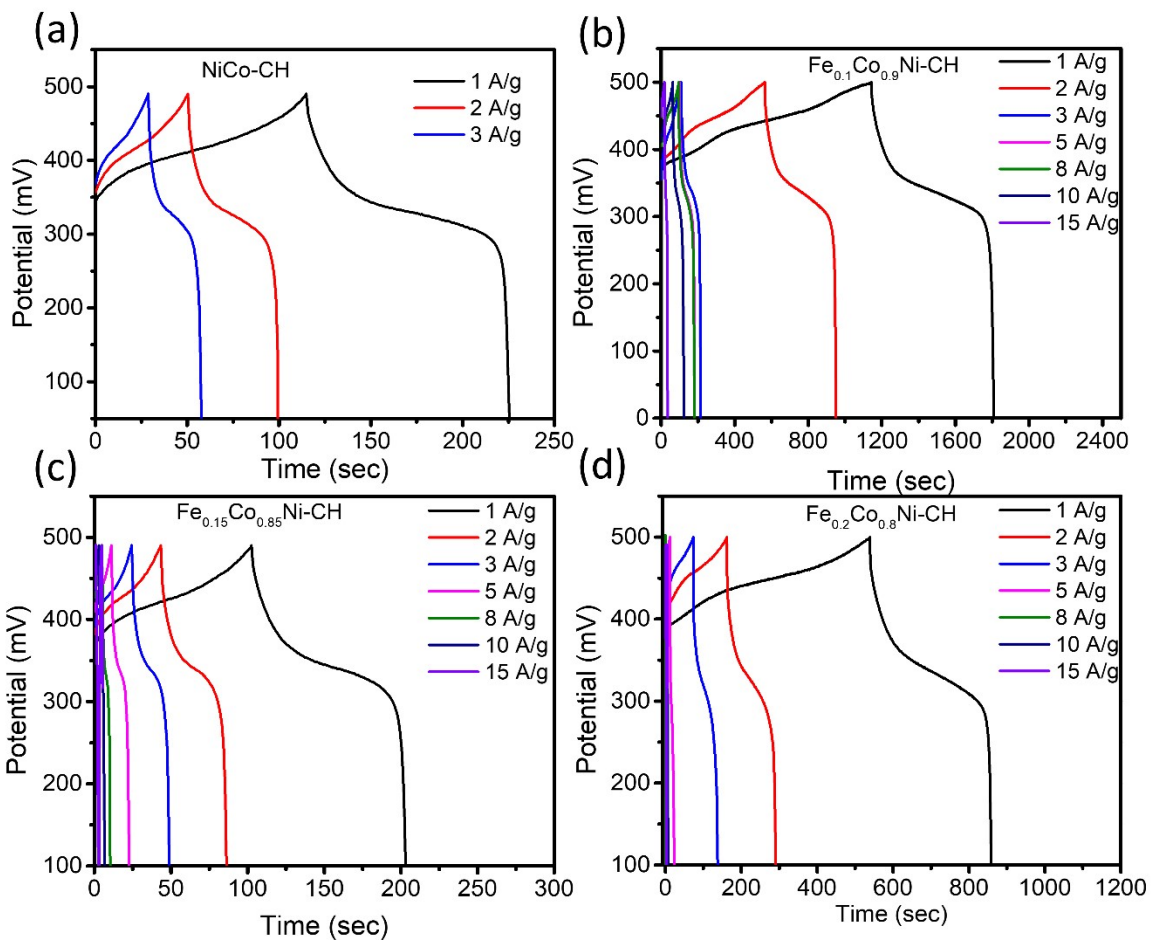

**Fig. S8:** GCD profiles of (a) NiCo-CH, (b)  $\text{Fe}_{0.05}\text{Co}_{0.95}\text{Ni-CH}$  (c)  $\text{Fe}_{0.15}\text{Co}_{0.85}\text{Ni-CH}$  (d)  $\text{Fe}_{0.2}\text{Co}_{0.8}\text{Ni-CH}$  at different current densities

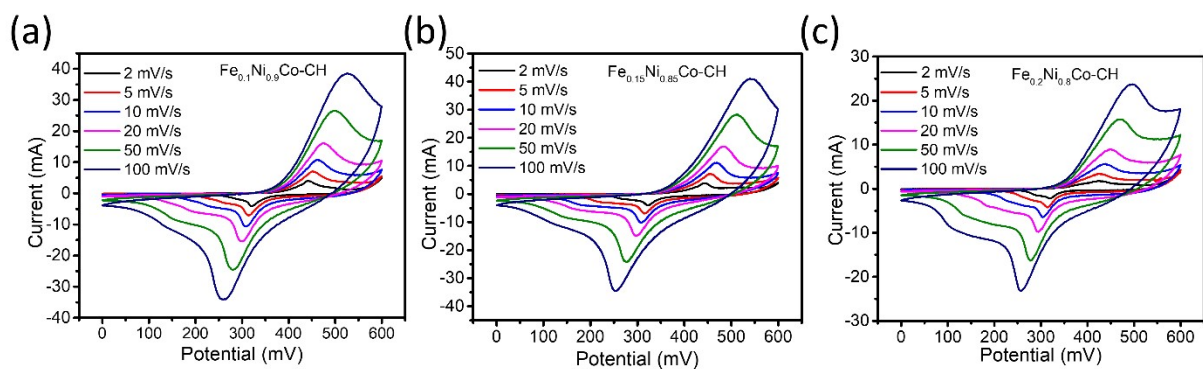

**Fig. S9:** CV plots of (a)  $\text{Fe}_{0.1}\text{Ni}_{0.9}\text{Co-CH}$  (b)  $\text{Fe}_{0.15}\text{Ni}_{0.85}\text{Co-CH}$  (c)  $\text{Fe}_{0.2}\text{Ni}_{0.8}\text{Co-CH}$  at different scan rates

**Table S3: Electrochemical super capacitive parameters of synthesized samples**

| Sample                                      | Csp (GCD)<br>Fg <sup>-1</sup> | b value | R <sub>s</sub> (Ω) | R <sub>ct</sub> (Ω) | CPE1<br>(mF·cm <sup>-2</sup> S) | CPE2<br>(mF·cm <sup>-2</sup> S) |
|---------------------------------------------|-------------------------------|---------|--------------------|---------------------|---------------------------------|---------------------------------|
| NiCo-CH                                     | 424                           | 0.51    | 1.48               | 18.864              | 16.34                           | 64.79                           |
| Fe <sub>0.05</sub> Co <sub>0.95</sub> Ni-CH | 895                           | 0.29    | 0.48               | 2.81                | 25.41                           | 1.406                           |
| Fe <sub>0.1</sub> Co <sub>0.90</sub> Ni-CH  | 1080                          | 0.45    | 2.5                | 4.72                | 121                             | 312                             |
| Fe <sub>0.15</sub> Co <sub>0.85</sub> Ni-CH | 804                           | 0.92    | 1.8                | 10.06               | 7.76                            | 695.84                          |
| Fe <sub>0.2</sub> Co <sub>0.80</sub> Ni-CH  | 841                           | 0.88    | 0.39               | 3.22                | 25.82                           | 1.12                            |
| Fe <sub>0.05</sub> Ni <sub>0.95</sub> Co-CH | 2898                          | 0.83    | 2.16               | 0.769               | 555                             | 670                             |
| Fe <sub>0.1</sub> Ni <sub>0.90</sub> Co-CH  | 1606                          | 0.56    | 2.5                | 10.92               | 120.5                           | 252.3                           |
| Fe <sub>0.15</sub> Ni <sub>0.85</sub> Co-CH | 423                           | 0.52    | 3.96               | 22.30               | 215                             | 128                             |
| Fe <sub>0.2</sub> Ni <sub>0.80</sub> Co-CH  | 216                           | 0.25    | 8.24               | 9.39                | 15.23                           | 40.34                           |

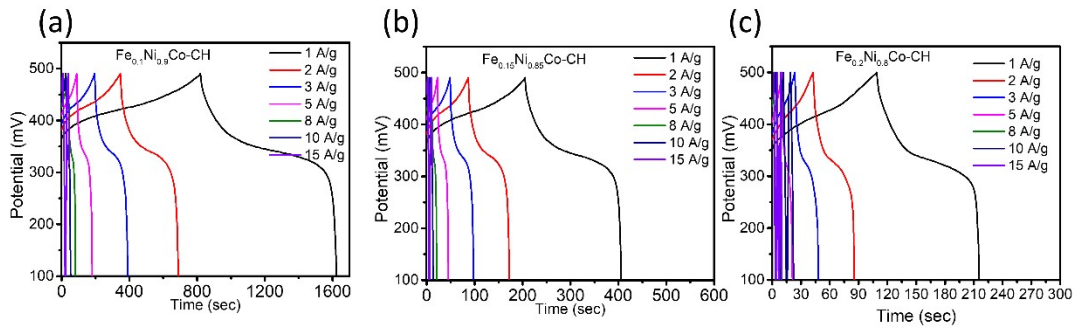

**Fig. S10:** GCD profiles of (a) Fe<sub>0.1</sub>Ni<sub>0.9</sub>Co-CH (b) Fe<sub>0.15</sub>Ni<sub>0.85</sub>Co-CH (c) Fe<sub>0.2</sub>Ni<sub>0.8</sub>Co-CH at different current densities

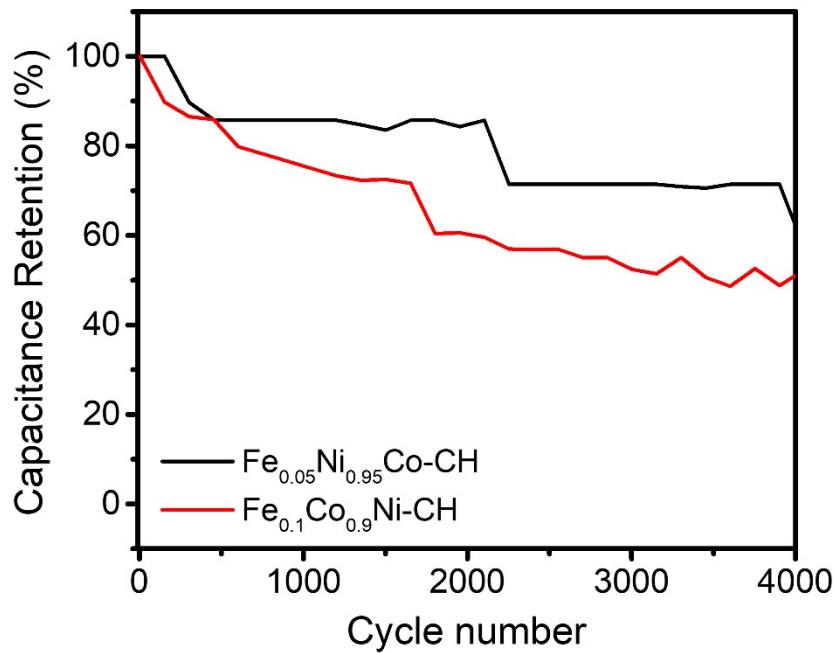

**Fig. S11:** Cyclic stability of Fe<sub>0.1</sub>Co<sub>0.9</sub>Ni-CH and Fe<sub>0.05</sub>Ni<sub>0.95</sub>Co-CH at current densities 10 A/g.

**Table S4: Literature Comparison for Supercapacitance Performance**

| Electrode Material                                    | Morphology          | Specific Capacitance | Reference       |
|-------------------------------------------------------|---------------------|----------------------|-----------------|
| NiCoFe-LDH                                            | Nanocomposite       | 3130 F/g at 1A/g     | 1               |
| Ni <sub>4</sub> /Co <sub>1</sub> (OH) <sub>2</sub>    | Nanostructure       | 1820 F/g at 1A/g     | 2               |
| Fe-Co Hydroxide (1:1 ratio)                           | —                   | 2255.6 F/g at 1A/g   | 3               |
| NiCo-CH (CH-S3)                                       | Layered             | 2130 F/g (at 2 A/g)  | 4               |
| CoNiFe-LDH/CNFs-0.5                                   | Nanofibers          | 1203 F/g             | 5               |
| NiCo-CH-180                                           | Nanorods            | 762 F/g at 1A/g      | 6               |
| NiCo-LDH                                              | Nanosheets          | 1470 F/g             | 7               |
| Fe <sub>x</sub> Co <sub>(1-x)</sub> Ni-CH (Optimized) | Nanorods (w/ FeOOH) | 1080 F/g at 1/A/g    | <b>Our Work</b> |
| Fe <sub>x</sub> Ni <sub>(1-x)</sub> Co-CH (Optimized) | Nanorods            | 2898 F/g at 1A/g     | <b>Our Work</b> |

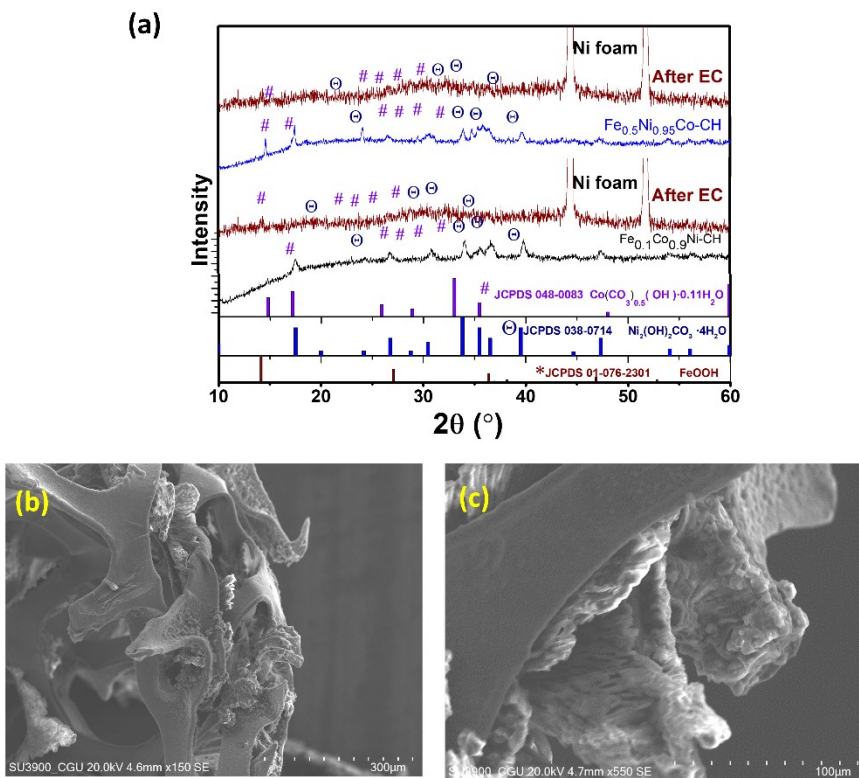

**Fig. S12:** (a) XRD pattern for Fe<sub>0.1</sub>Co<sub>0.9</sub>Ni-CH and Fe<sub>0.05</sub>Ni<sub>0.95</sub>Co-CH after electrochemical cycling stability, (b) and (c) SEM images of Fe<sub>0.1</sub>Co<sub>0.9</sub>Ni-CH and Fe<sub>0.05</sub>Ni<sub>0.95</sub>Co-CH post electrochemical cycling respectively.

## References:

- (1) Pourfarzad, H.; Shabani-Nooshabadi, M.; Ganjali, M. R.; Kashani, H. Synthesis of Ni–Co-Fe Layered Double Hydroxide and Fe<sub>2</sub>O<sub>3</sub>/Graphene Nanocomposites as Actively Materials for High Electrochemical Performance Supercapacitors. *Electrochimica Acta* **2019**, *317*, 83–92. <https://doi.org/10.1016/j.electacta.2019.05.122>.
- (2) Li, H.; Zhou, X.; Zhao, P. Amorphous Ni–Co Binary Hydroxide with Super-Long Cycle Life and Ultrahigh Rate Capability as Asymmetric Supercapacitors. *Nanotechnology* **2023**, *34* (6), 065703. <https://doi.org/10.1088/1361-6528/aca1cb>.
- (3) Jiang, L.; Sui, Y.; Qi, J.; Chang, Yuan.; He, Y.; Meng, Q.; Wei, F.; Sun, Z.; Jin, Y. Structure Dependence of Fe-Co Hydroxides on Fe/Co Ratio and Their Application for Supercapacitors. *Part & Part Syst Charact* **2017**, *34* (2), 1600239. <https://doi.org/10.1002/ppsc.201600239>.
- (4) Lim, H.; Park, Y. S.; Baek, S. Structure and Electrochemical Performances of NiCo Hydroxide with Anion Exchange by Carbonates for Hybrid Supercapacitor. *J Am Ceram Soc.* **2025**, *108* (10), e70061. <https://doi.org/10.1111/jace.70061>.
- (5) Wang, F.; Sun, S.; Xu, Y.; Wang, T.; Yu, R.; Li, H. High Performance Asymmetric Supercapacitor Based on Cobalt Nickle Iron-Layered Double Hydroxide/Carbon Nanofibres and Activated Carbon. *Sci Rep* **2017**, *7* (1), 4707. <https://doi.org/10.1038/s41598-017-04807-1>.
- (6) Kumar, S.; Satpathy, B. K.; Pradhan, D. Morphology-Controlled Synthesis of a NiCo-Carbonate Layered Double Hydroxide as an Electrode Material for Solid-State Asymmetric Supercapacitors. *Mater. Adv.* **2024**, *5* (6), 2271–2284. <https://doi.org/10.1039/D3MA01008B>.
- (7) Kumar, S.; Pradhan, D. Binder- and Additive-Free Electrophoretic Deposition of Solvothermally Synthesized Nickel–Cobalt Layered Double Hydroxide for High-Performance Asymmetric Solid-State Supercapacitor. *ACS Appl. Energy Mater.* **2025**, *8* (13), 9878–9890. <https://doi.org/10.1021/acsaem.5c01703>.
